# Supplementary material
Source: Research Square preprint supplement (doi:10.21203/rs.3.rs-8767279/v1)
Supplement: Supplementary file 1 [file f9ae66f95a379162fe11dce4.pdf]

# Dr. Caroline Wanjara's Tool

Date of data collection :

---

Form number :

---

Participant's contact details :

---

## SECTION 1: Demographic Information

Participant ID :

---

Age :

---

Residence :

- Moshi Urban
- Moshi Rural
- Hai
- Mwanga
- Rombo
- Siha

Education Level :

- No formal education
- Primary
- Secondary
- Tertiary

**Marital Status :**

- Single
- Married/Cohabiting
- Divorced
- Widowed

**Occupation :**

- Unemployed
- Employed/ Self-employed
- Student

**Referral case :**

- Yes
- No

## **SECTION 2: Medical and Obstetric History**

**History of fertility treatment :**

- Yes
- No

### **» ANC Details**

**Gestation age at booking :**

---

**Number of ANC visits :**

---

**Maternal height in cm :**

---

**Weight at Delivery in Kgs :**

---

BMI is NaN Kg/m<sup>2</sup>

---

**Hemoglobin level at delivery :**

- $\geq 12$
- 10.0 - 11.9
- 7.0 - 9.9
- $< 7.0$

**SECTION 3: Labor and Delivery Details****Gestation age at delivery in Weeks :**

---

**Fetal lie :**

- Longitudinal
- Transverse
- Oblique

**Fetal presenting part :**

---

**Cervical dilation on admission :**

- $\leq 4$
- 4 - 7
- $\geq 8$

**Type of Labor Onset :**

- Spontaneous
- Induced
- Not in labor

**Reason for Induction :**

---

**Method of induction :**

---

**Time of membrane rupture :**

- Before labor onset
- During labor
- Not ruptured

**Type of membrane rupture**

- Spontaneous
- Artificial rupture of membrane

**Mode of Delivery :**

- Vaginal
- Caesarean Section

**If Caesarean Section, indicate the reason :**

- Fetal distress
- Dystocia
- Breech presentation
- Maternal request
- Other
- obstructed labor
- non reassuring fetal status
- malpresentation

**If Other Specify :**

---

**Type of anaesthesia**

- General anaesthesia
- Regional anaesthesia

**Presence of Birth Companion :**

- Yes
- No

**SECTION 4: Neonatal Outcomes****Fetal Weight at Birth (in grams):**

---

**» APGAR SCORE****Apgar Score at 1 Minute :**

---

**Apgar Score at 5 Minutes :**

- $\leq 7$
- $> 7$

**Neonatal Admission after delivery :**

- NICU
- P3
- No

**Reason for admission :**

---

**Breastfeeding initiation within 1 hour:**

- Yes
- No

**Neonatal Death within 24 Hours :**

- Yes
- No

**SECTION 5: Maternal Outcomes****Postpartum Hemorrhage (PPH) :**

- Yes
- No

**If PPH yes, was it?**

- Primary PPH
- Secondary PPH

**Hysterectomy :**

- Yes
- No

**Intensive Care Unit (ICU) Admission :**

- Yes
- No

**Sepsis :**

- Yes
- No

**If yes, was it?**

- Pyrexia
- Endometritis
- Surgical site infection
- Other

**If other, specify :**

---

**Maternal Mortality :**

- Yes
- No

**SECTION 6: Maternal follow up (7 - 14 days)**

**PPH :**

- Yes
- No

**Hysterectomy :**

- Yes
- No

**ICU admission :**

- Yes
- No

**Sepsis :**

- Yes
- No

**If yes, was it?**

- Pyrexia
- Endometritis
- Surgical site infection
- Other

**If other, specify :**

---

**Maternal death :**

- Yes
- No

## **SECTION 7: Maternal outcomes at day 28**

**PPH :**

- Yes
- No

**Hysterectomy :**

- Yes
- No

**ICU admission :**

- Yes
- No

**Sepsis :**

- Yes
- No

**If yes, was it?**

- Pyrexia
- Endometritis
- Surgical site infection
- Other

**If other, specify :**

---

**Maternal death :**

Yes

No

## **SECTION 8: Additional Information**

**Any other complications or observations during delivery or peuperium?**

---
